# Supplementary material for: Surface Structure Engineering of PdAg Alloys with Boosted CO2 Electrochemical Reduction Performance
Source: MDPI journal article supplement (doi:10.3390/nano12213860), 2022-11-01
Supplement: s1 [file s1]

## Supplementary Materials

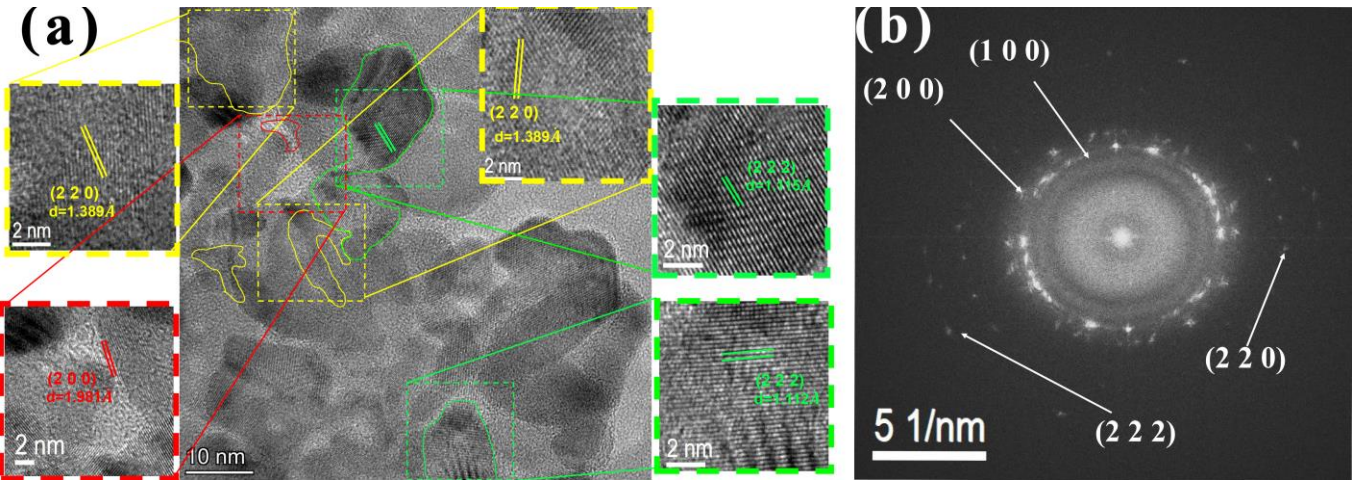

**Figure S1.** (a) high-resolution TEM images of Pd<sub>3</sub>Ag; (b) Selective Area Electron Diffraction (SAED) of Pd<sub>3</sub>Ag.

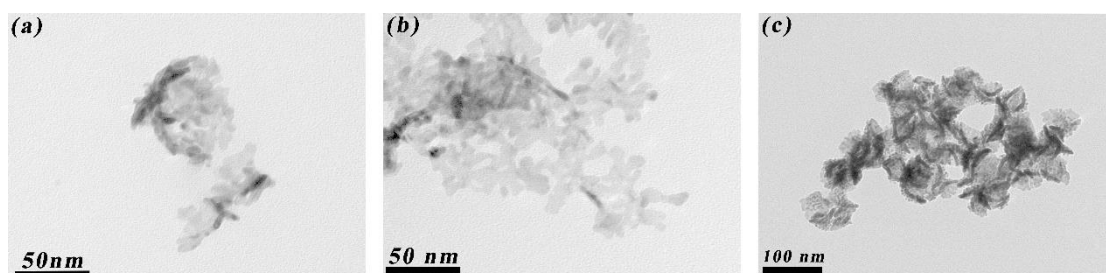

**Figure S2.** TEM images of (a) Pd/Ag=2:1; (b) Pd/Ag=1:1; (c) pure Pd.

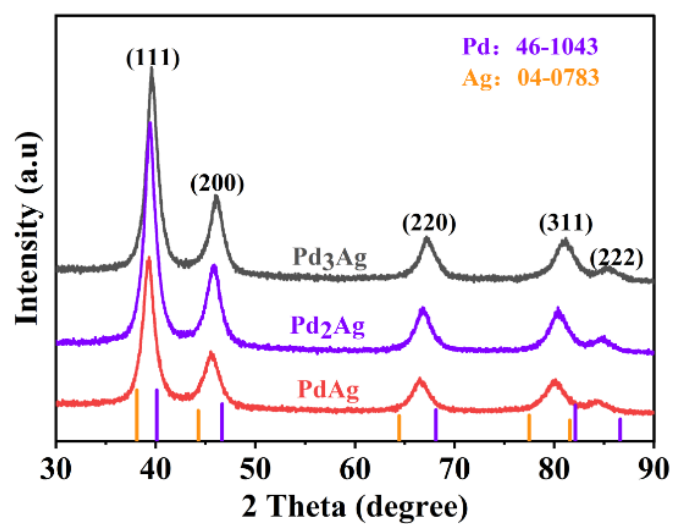

**Figure S3.** XRD patterns of Pd<sub>3</sub>Ag, Pd<sub>2</sub>Ag, and PdAg.

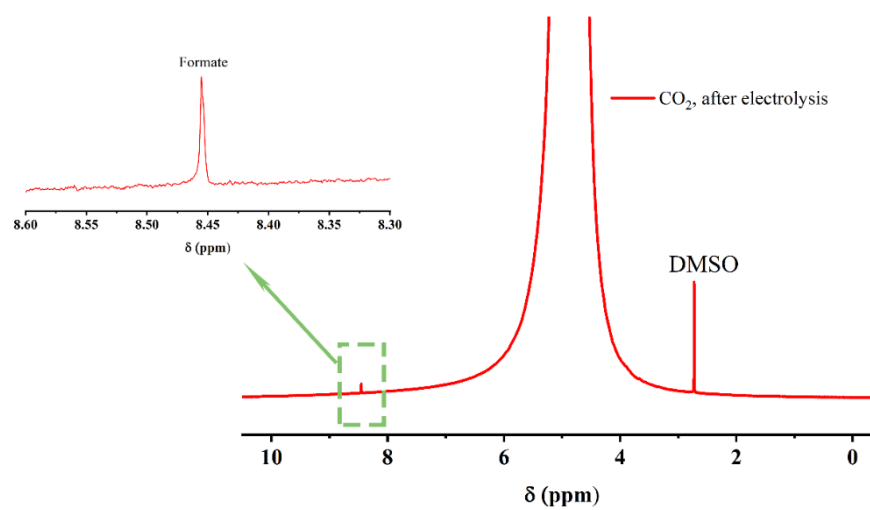

**Figure S4.** <sup>1</sup>H NMR spectra of the liquid conversion products for Pd<sub>3</sub>Ag alloy after electrolysis for 1 h at -0.2 V(vs RHE).

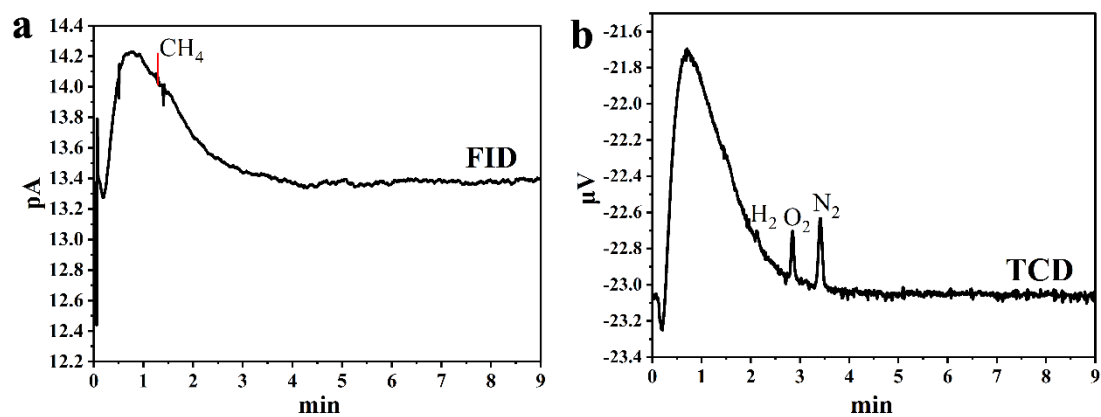

**Figure S5.** GC spectra of the gas conversion products detected via (a) Thermal Conductivity Detector (TCD) and (b) Flame Ionization Detector (FID) for  $\text{Pd}_3\text{Ag}$  alloy after electrolysis for 1 h at -0.2 V (vs RHE).

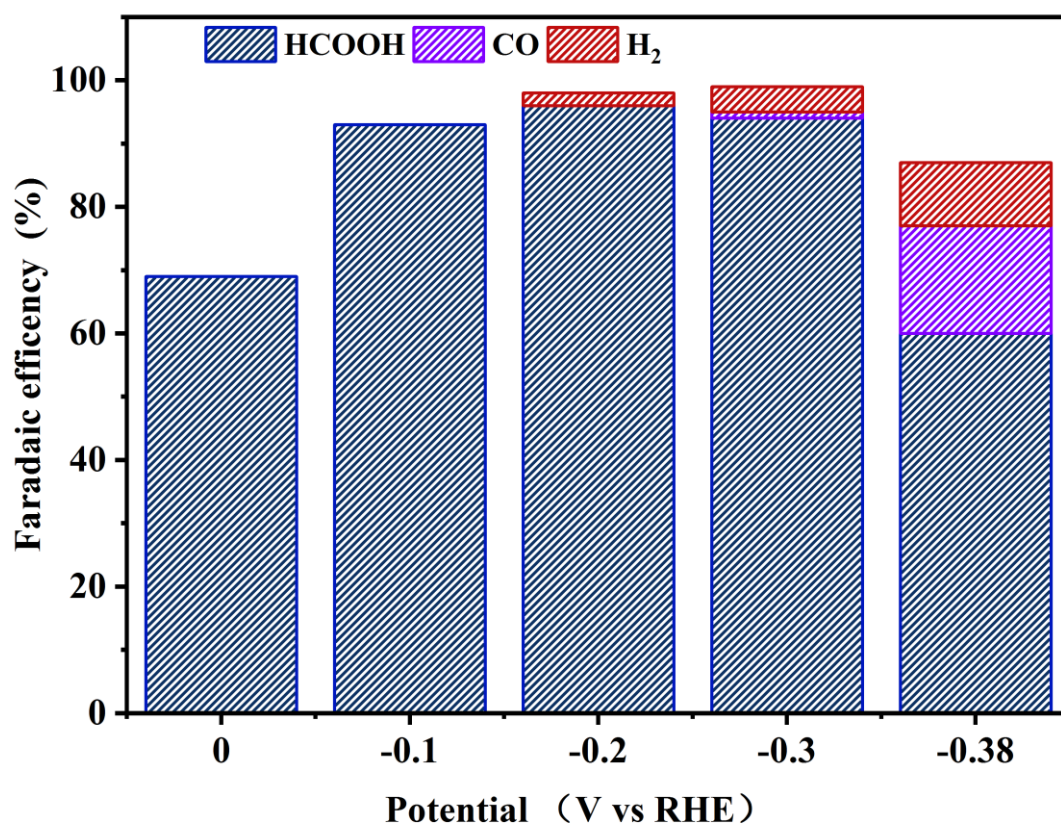

**Figure S6.** Potential-dependent FE for CRR products and partial current density.

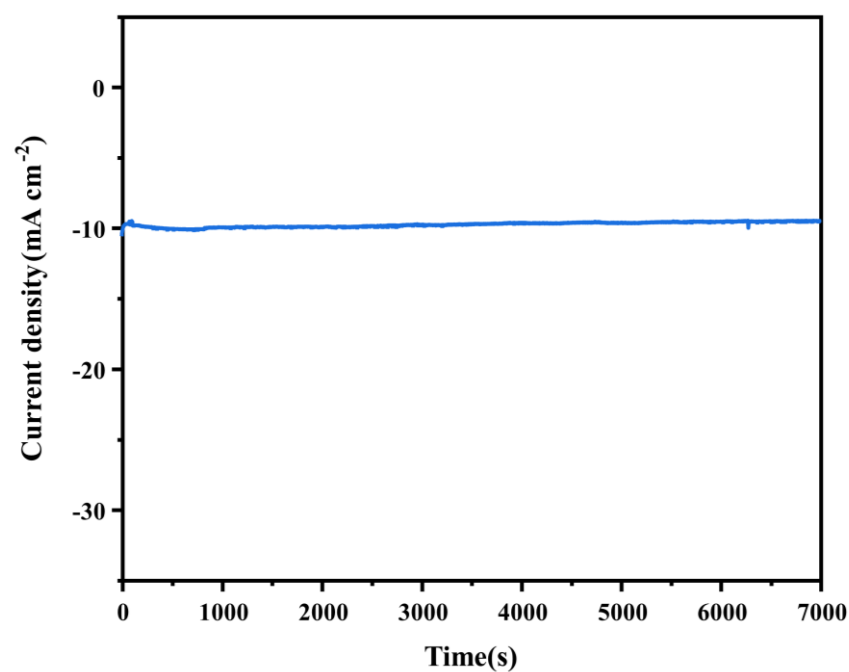

**Figure S7.** Chronoamperometric curves for Pd<sub>3</sub>Ag at -0.2 V (vs RHE) in CRR.

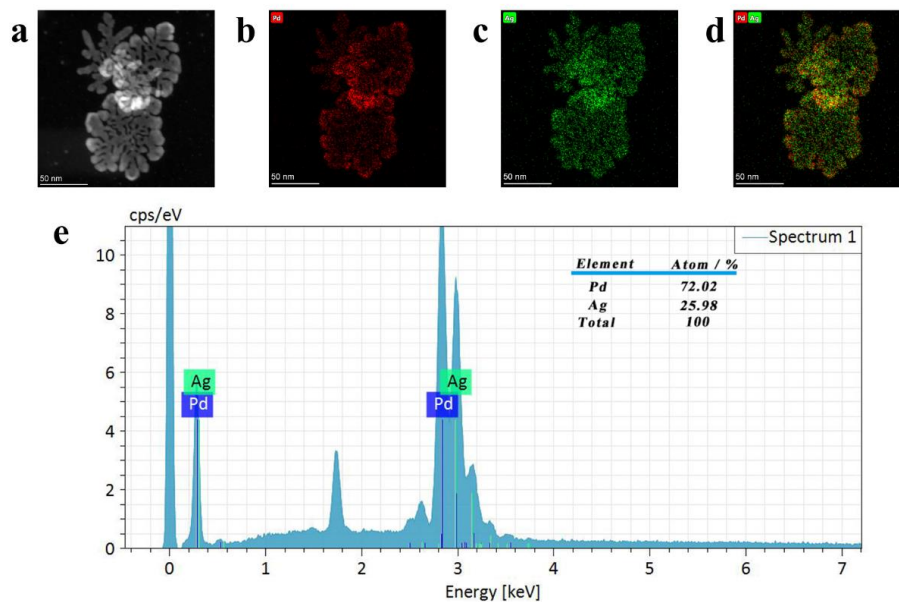

**Figure S8.** Structural characterizations of bimetallic Pd<sub>3</sub>Ag after long-term durability test. (a) HADDF-STEM-EDS mapping of Pd and Ag in the selected area. Elemental mapping of (b)Pd, (c) Ag, and (d) a mixed pattern of Pd and Ag. (e) The EDX spectra of the Pd<sub>3</sub>Ag after a long-term durability test.

**Table S1.** Comparison of different catalysts in electrochemical CRR for HCOOH formation.

| catalysts                                                             | product | FE     | Overpotential/ V<br>(vs. reference<br>hydrogen<br>electrode) |  | Referenece<br>No     |
|-----------------------------------------------------------------------|---------|--------|--------------------------------------------------------------|--|----------------------|
| <b>Pd<sub>3</sub>Ag</b>                                               | HCOOH   | 96%    | -0.2                                                         |  | <b>this<br/>work</b> |
| Pd <sub>4</sub> Ag nanowires                                          | HCOOH   | 90%    | -0.3                                                         |  | 1                    |
| Pd <sub>70</sub> Pt <sub>30</sub> /C nanoparticles                    | HCOOH   | 88%    | -0.4                                                         |  | 2                    |
| Pd nanoparticle films                                                 | HCOOH   | 50~60% | -0.4                                                         |  | 3                    |
| Nanoporous Ag-Sn                                                      | HCOOH   | 85%    | -0.8                                                         |  | 4                    |
| Ag-Sn Bimetallic                                                      | HCOOH   | 80%    | -0.8                                                         |  | 5                    |
| Pd-B/C                                                                | HCOOH   | 70%    | -0.5                                                         |  | 6                    |
| 4,4',4'',4'''(1,4phenylenebis(pyridine-4,2,6-triyl))tetrabenzoic acid | HCOOH   | 90.5%  | -1.8                                                         |  | 7                    |

## References

1. Han, N.; Sun, M.; Zhou, Y.; Xu, J.; Cheng, C.; Zhou, R.; Zhang, L.; Luo, J.; Huang, B.; Li, Y., Alloyed Palladium-Silver Nanowires Enabling Ultrastable Carbon Dioxide Reduction to Formate. *Adv. Mater.* **2021**, 33 (4), 2005821.
2. Kortlever, R.; Balemans, C.; Kwon, Y.; Koper, M. T. M., Electrochemical CO<sub>2</sub> reduction to formic acid on a Pd-based formic acid oxidation catalyst. *Catal. Today* **2015**, 244, 58-62.
3. Zhou, F. L.; Li, H. T.; Fournier, M.; MacFarlane, D. R., Electrocatalytic CO<sub>2</sub> Reduction to Formate at Low Overpotentials on Electrodeposited Pd Films: Stabilized Performance by Suppression of CO Formation. *Chemsuschem* **2017**, 10 (7), 1509-1516.
4. Wang, X.; Xiao, W.; Zhang, J.; Wang, Z.; Jin, X., Nanoporous Ag-Sn derived from codeposited AgCl-SnO<sub>2</sub> for the electrocatalytic reduction of CO<sub>2</sub> with high formate selectivity. *Electrochem. Commun.* **2019**, 102, 52-56.
5. Luc, W.; Collins, C.; Wang, S. W.; Xin, H. L.; He, K.; Kang, Y. J.; Jiao, F., Ag-Sn Bimetallic Catalyst with a Core-Shell Structure for CO<sub>2</sub> Reduction. *J. Am. Chem. Soc.* **2017**, 139 (5), 1885-1893.
6. Jiang, B.; Zhang, X. G.; Jiang, K.; Wu, D. Y.; Cai, W. B., Boosting Formate Production in Electrocatalytic CO<sub>2</sub> Reduction over Wide Potential Window on Pd Surfaces. *J. Am. Chem. Soc.* **2018**, 140 (8), 2880-2889.
7. Kang, X.; Li, L.; Sheveleva, A.; Han, X.; Li, J.; Liu, L.; Tuna, F.; McInnes, E. J. L.; Han, B.; Yang, S.; Schroder, M., Electro-reduction of carbon dioxide at low over-potential at a metal-organic framework decorated cathode. *Nat Commun* **2020**, 11 (1), 5464.
